# Supplementary material for: Low serum lymphocyte level is associated with poor exercise capacity and quality of life in chronic obstructive pulmonary disease
Source: PubMed Central journal article supplement (PMC7366616; doi:10.1038/s41598-020-68670-3), 2020-07-16

## Supplementary Materials

**TITLE: Low serum lymphocyte level is associated with poor exercise capacity and quality of life in chronic obstructive pulmonary disease**

Sung Woo Moon<sup>1</sup>, Ah Young Leem<sup>1</sup>, Young Sam Kim<sup>1</sup>, Ji-Hyun Lee<sup>2</sup>, Tae-Hyung Kim<sup>3</sup>, Yeon-Mok Oh<sup>4</sup>, Hyejung Shin<sup>5</sup>, Joon Chang<sup>1</sup>, Ji Ye Jung<sup>1</sup>, and KOLD Study Group

**Affiliations:**

<sup>1</sup>Division of Pulmonology, Department of Internal Medicine, Severance Hospital, Yonsei University College of Medicine., Seoul, Republic of Korea

<sup>2</sup>Department of Internal Medicine, CHA Bundang Medical Center, CHA University, Seongnam, Republic of Korea

<sup>3</sup>Division of Pulmonary and Critical Care Medicine, Hanyang University Guri Hospital, Hanyang University College of Medicine, Guri, Republic of Korea

<sup>4</sup>Department of Pulmonary and Critical Care Medicine and Clinical Research Center for Chronic Obstructive Airway Diseases, Asan Medical Center, University of Ulsan College of Medicine, Seoul, Republic of Korea

<sup>5</sup>Biostatistics Collaboration Unit, Department of Biomedical Systems Informatics, Yonsei University College of Medicine, Seoul, Korea

Supplementary Figure 1. Serum lymphocyte percent (%) over the follow-up period.

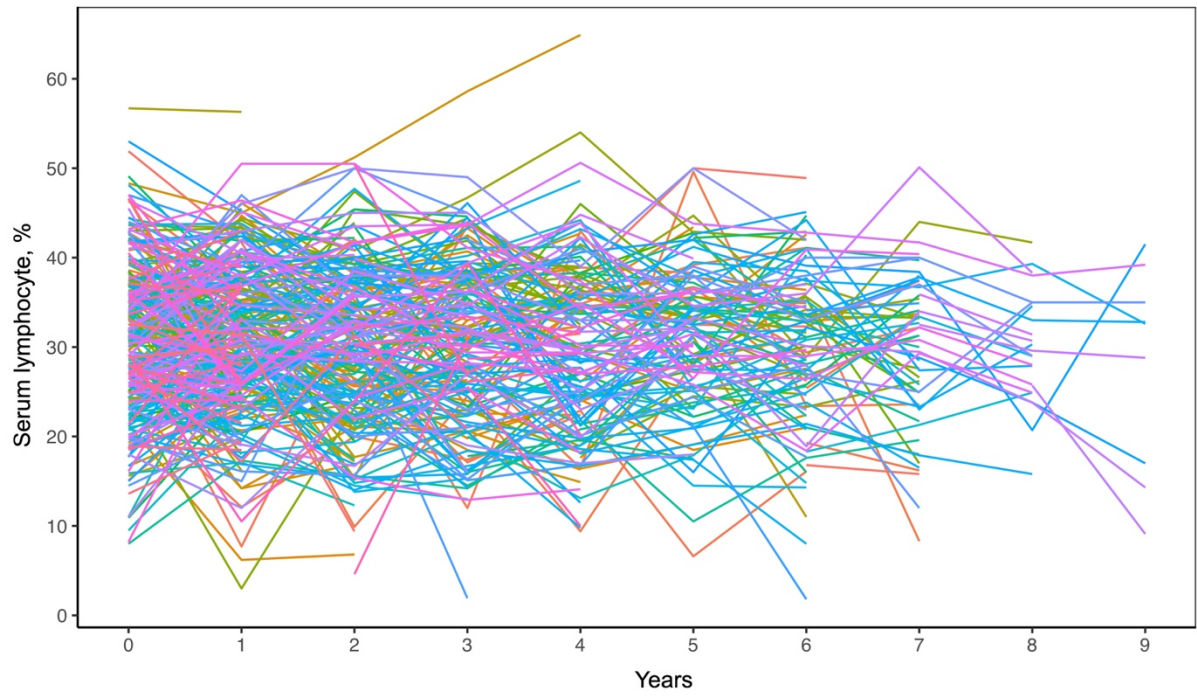

Supplement: 41598_2020_68670_MOESM1_ESM.pdf [file 41598_2020_68670_MOESM1_ESM.pdf]
